# Supplementary material for: A colloidal system of polythiophene-grafted edge-gold-coated silver nanoprisms with enhanced optical properties and stability
Source: Royal Society of Chemistry journal article supplement (doi:10.1039/c6nj02868c), 2016-11-16
Supplement: c6nj02868c1.pdf [file c6nj02868c1.pdf]

## Electronic Supplementary Information

### Colloidal system of polythiophene-grafted edge-gold-coated silver nanoprisms with enhanced optical properties and stability

*Sugyeong Jeong, Dongki Lee, Joon Ki Kim, and Du-Jeon Jang\**

Department of Chemistry, Seoul National University, Seoul 08826, Korea

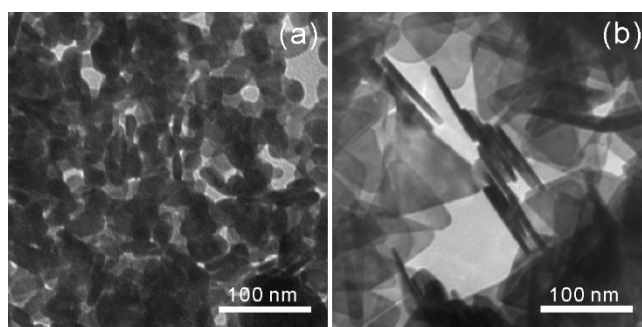

**Fig. S1** TEM images of (a) Ag-PRs and (b) AuAg-PRs.

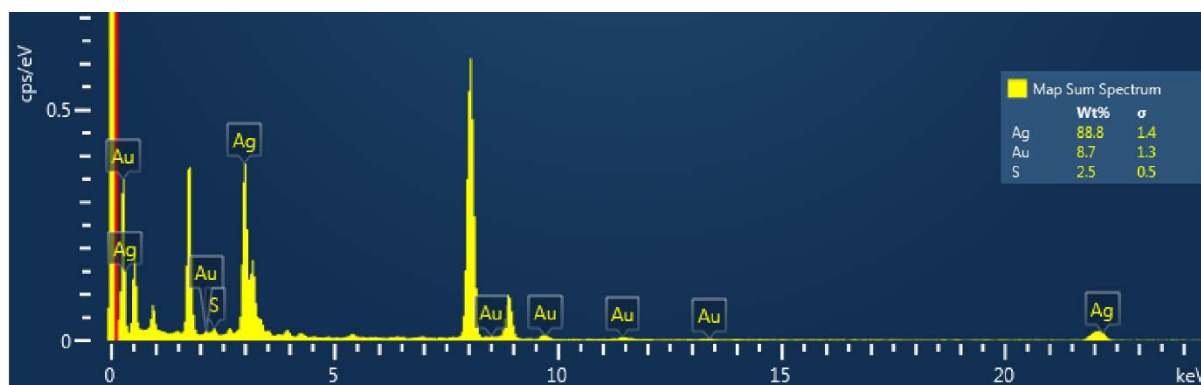

**Fig. S2** EDX analysis spectrum of P3HT@AuAg-PRs, where the molar percentages of silver, gold, and sulfur have been observed to be 88.8%, 8.7%, and 2.5%, respectively.

**Table S1** Binding energies in eV for the deconvoluted curves of S 2p XPS spectra.

| Sample       | S 2p <sub>1/2</sub> | S 2p <sub>3/2</sub> | S' 2p <sub>1/2</sub> | S' 2p <sub>3/2</sub> |
|--------------|---------------------|---------------------|----------------------|----------------------|
| P3HT         | 164.76<br>(26.3%)   | 163.58<br>(52.5%)   | 164.13<br>(7.1%)     | 162.95<br>(14.1%)    |
| P3HT@AuAg-PR | 164.72<br>(20.8%)   | 163.54<br>(41.7%)   | 164.25<br>(12.5%)    | 163.07<br>(25.0%)    |

**Table S2** Binding energies in eV for the deconvoluted curves of Ag 3d and Au 4f XPS spectra.

| Sample       | Ag' 3d <sub>5/2</sub> | Ag 3d <sub>5/2</sub> | Au 4f <sub>7/2</sub> | Au' 4f <sub>7/2</sub> |
|--------------|-----------------------|----------------------|----------------------|-----------------------|
| AuAg-PR      | 368.95<br>(5.2%)      | 367.72<br>(94.8%)    | 83.80<br>(52.6%)     | 83.39<br>(47.4%)      |
| P3HT@AuAg-PR | 368.15<br>(19.3%)     | 367.14<br>(80.7%)    | 83.32<br>(61.9%)     | 82.80<br>(38.1%)      |

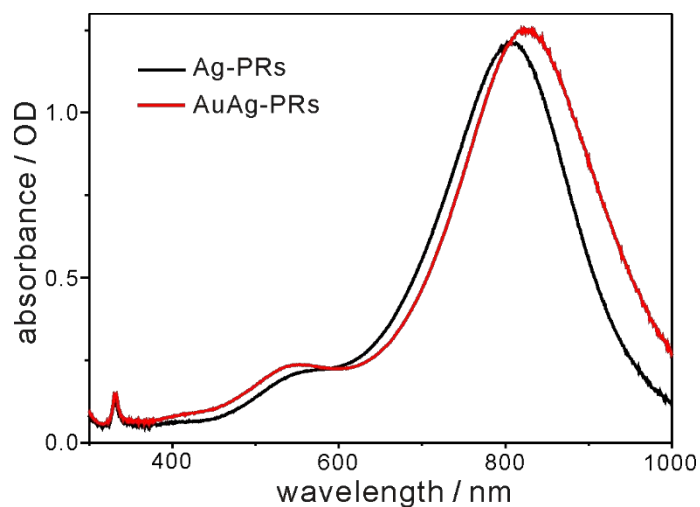**Fig. S3** Absorption spectra of Ag-PRs and AuAg-PRs dispersed in water.**Table S3** Spectral positions of four Gaussian curves extracted from the subtracted absorption spectrum of Figure 5b.

| $\lambda_1$ / nm        | $\lambda_2$ / nm | $\lambda_3$ / nm | $\lambda_4$ / nm |
|-------------------------|------------------|------------------|------------------|
| 506±9 (4%) <sup>a</sup> | 522±14 (14%)     | 556±26 (50%)     | 606±22 (32%)     |

<sup>a</sup>Absorbance percentage of each curve.

**Table S4** Half lifetimes ( $t_{1/2}$ ) for the morphology deformation of nanoprisms via  $\text{H}_2\text{O}_2$ .

| Samples      | $t_{1/2}$ / min |
|--------------|-----------------|
| Ag-PR        | 6               |
| AuAg-PR      | 13              |
| P3HT@AuAg-PR | 290             |

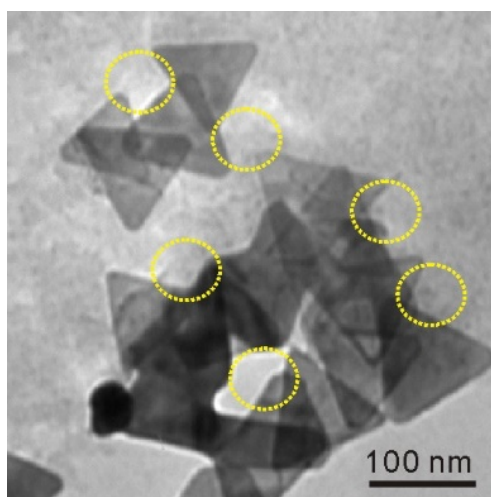

**Fig. S4** TEM image of P3HT@AuAg-PRs and hot spots marked with yellow-dotted circles.
